# Supplementary material
Source: PubMed Central journal article supplement (PMC4579437)
Supplement: AEM.01259-15_zam999116659so1.pdf [file AEM.01259-15_zam999116659so1.pdf]

**Table S1.** Top blast hit, Mothur-based classification, accession number and percent identity of the 10 most abundant OTUs (making up at least 1% of the entire dataset).

| <b>OTU</b>     | <b>Mothur classification</b> | <b>Top BLAST hit</b>       | <b>Accession Number</b> | <b>% Identity</b> |
|----------------|------------------------------|----------------------------|-------------------------|-------------------|
| <b>OTU0001</b> | Fructobacillus               | Fructobacillus fructosus   | JX896573.1              | 100%              |
| <b>OTU0002</b> | Firm-4                       | Lactobacillus sp.          | JX896491.1              | 100%              |
| <b>OTU0003</b> | Firm-5                       | Lactobacillus sp.          | JX896473.1              | 100%              |
| <b>OTU0025</b> | Firm-5                       | Lactobacillus sp.          | JX896461.1              | 100%              |
| <b>OTU0039</b> | Bacillus weihenstephanensi   | Bacillus thuringiensis     | CP010088.1              | 100%              |
| <b>OTU0072</b> | Alpha 2.2                    | Acetobacteraceae           | KM454405.1              | 100%              |
| <b>OTU0092</b> | Lactobacillales              | Lactobacillus kunkeei      | KM454401.1              | 100%              |
| <b>OTU0107</b> | Bifidobacteriaceae           | Bifidobacterium asteroides | KM454415.1              | 100%              |
| <b>OTU0115</b> | Firm-5                       | Lactobacillus sp.          | JX896483.1              | 100%              |
| <b>OTU0412</b> | Firm-5                       | Lactobacillus sp.          | JX896514.1              | 100%              |

```

>OTU001 Fructobacillus
TACGTATGTCCCGAGCGTTATCCGGATTTATTGGGCGTAAAGCGAGCGCAGACGGTTGCTTAAGTCTGAAGTGAAGCCC
ACAGCTCAACTGTGGAATGGCTTGGAAACTGGGCAACTTGAGTGCAGTAGAGGTAAGTGGAACTCCATGTGTAGCGGTG
GAATGCGTAGATATATGGAAGAACCACAGTGGCGAAGGCGGCTTACTGGACTGCAACTGACGTTGAGGCTCGAAAGTGTG
GGTAGCAACACAGG
>OTU0002 Firm4
TACGTAGGTGGCAAGCGTTGTCCGGATTTATTGGGCGTAAAGGGAGCGCAGGCGGCTTTTTAAGTCTGAATGTGAAAGCC
CTCAGCTTAACGTAGGAAGAGCATCGGAAACTGAGAGACTTGAGTGCAGAAGAGGAGAGTGGAACTCCATGTGTAGCGGT
GAAATGCGTAGATATATGGAAGAACCACAGTGGCGAAGGCGGCTCTCTGGTCTGTTACTGACGCTGAGGCTCGAAAGCAT
GGTAGCGAACACAGG
>OTU0003 Firm5
GACGTAGGTGGCAAGCGTTGTCCGGATTTATTGGGCGTAAAGCGAACGCAGGCGGGAGAATAAGTCAGCTGTGAAAGCCC
CCAGCTTAACGTGGGAACGCAACTGAAACTATTTTTCTTGAGTGCAGAAGAGGAGAGTGGAACTCCATGTGTAGCGGTG
GAATGCGTAGATATATGGAAGAACCACAGTGGCGAAGGCGGCTCTCTGGTCTGTTAACTGACGCTGAGGTTTCGAAAGCATG
GGTAGCGAACACAGG
>OTU0025 Firm5
TACGTAGGTGGCAAGCGTTGTCCGGATTTATTGGGCGTAAAGCGAACGCAGGCGGGAGAATAAGTCAGCTGTGAAAGCCC
CCAGCTTAACGTGGGAACGCAACTGAAACTATTTTTCTTGAGTGCAGAAGAGGAGAGTGGAACTCCATGTGTAGCGGTG
GAATGCGTAGATATATGGAAGAACCACAGTGGCGAAGGCGGCTCTCTGGTCTGTTAACTGACGCTGAGGTTTCGAAAGCATG
GGTAGCGAACACAGG
>OTU0039 Bacillus weihenstephanensi
TACGTAGGTGGCAAGCGTTATCCGGATTTATTGGGCGTAAAGCGCGCAGGTTGGTTTCTTAAGTCTGATGTGAAAGCCC
ACGGCTCAACCGTGGAGGTCATTGGAAACTGGGAGACTTGAGTGCAGAAGAGGAAAGTGGAACTCCATGTGTAGCGGTG
AAATGCGTAGATATGGAAGAACCACAGTGGCGAAGGCGACTTTCTGGTCTGTTAACTGACACTGAGGCGGAAAGCGTG
GGGAGCAACACAGG
>OTU0072 Alpha2.2
TACGAAGGGGGTAGCGTTGCTCGGAATGACTGGGCGTAAAGGGCGCGTAGGCTGTTTGTACAGTCAGATGTGAAATCCC
CGGGCTTAACCTGGGAACGCAATTTGATACGTGCAGACTAGAGTCCGAGAGAGGGTTGTGGAAATCCCAGTGTAGAGGTG
AAATTCGTAGATATGGAAGAACCACCGTTGCGAAGGCGCAACTGGTCTCGGAACGACTGACGCTGAGGCGGAAAGCGTG
GGGAGCGAACACAGG
>OTU0092 Lacto
TACGTAGGTGGCAAGCGTTGTCCGGATTTATTGGGCGTAAAGCGAGCGCAGGCGGTTTTGTAAAGTCTGCTGTGAAAGCCC
TCAGCTCAACTGAGGAAGTGCAGTGGAACTACAAAACCTGAGTACAGAAGAGGAAAGTGGAACTCCATGTGTAGCGGTG
AAATGCGTAGATATATGGAAGAACCACAGTGGCGAAGGCGGCTTTCTGGTCTGTTACTGACGCTGAGGCTCGAAAGCATG
GGTAGCGAACACAGG
>OTU0107 Bifido
TACGTAGGTGGCAAGCGTTATCCGGATTTATTGGGCGTAAAGAGCTCGTAGGCGGTTCTGTCGCTGTTGGTGTGAAAGTCC
ATCGCTTAACGGTGGATCGGGCCGGGTACGGGCGGACTGGAGTGCAGGAGAGGAGACTGGAAATCCCAGTGTACCGGTG
GAATGCGTAGATATGGAAGAACCACCGATGGCGAAGGCGAGTCTCTGGCCGCTCACTGACGCTGAGGAGCGAAAGCGTG
GGGAGCGAACACAGG
>OTU0115 Firm5
TACGTAGGTGGCAAGCGTTGTCCGGATTTATTGGGCGTAAAGCGAACGCAGGCGGGAGAATAAGTCAGCTGTGAAAGCCC
TCAGCTTAACGTGGGAACGCAACTGAAACTATTTTTCTTGAGTGCAGAAGAGGAGAGTGGAACTCCATGTGTAGCGGTG
GAATGCGTAGATATATGGAAGAACCACAGTGGCGAAGGCGGCTCTCTGGTCTGTTAACTGACGCTGAGGTTTCGAAAGCATG
GGTAGCGAACACAGG
>OTU0412 Firm5
TACGTAGGTGGCAAGCGTTGTCCGGATTTATTGGGCGTAAAGCGAACGCAGGCGGGAGAACAAGTCAGCTGTGAAAGCCC
TCGGCTTAACCGAGGAACGGCAACTGAAACTGTTTTTCTTGAGTGCAGAAGAGGAGAGTGGAACTCCATGTGTAGCGGTG
AAATGCGTAGATATATGGAAGAACCACAGTGGCGAAGGCGGCTCTCTGGTCTGTTAACTGACGCTGAGGTTTCGAAAGCATG
GGTAGCGAACACAGG

```

Supplementary File 1. Fasta formatted sequence representatives for each of the top 10 most abundant OTUs in the dataset.

| OTU     | Size   | Taxonomy                                                                                                                                       |
|---------|--------|------------------------------------------------------------------------------------------------------------------------------------------------|
| Otu0001 | 372961 | k__Bacteria(100);p__Firmicutes(100);c__Bacilli(100);o__Lactobacillales(100);f__Leuconostocaceae(100);g__Fructobacillus(100);unclassified(100); |
| Otu0002 | 15005  | Bacteria(100);Firmicutes(100);Bacilli(100);Lactobacillales(100);firm-4(100);unclassified(100);unclassified(100);                               |
| Otu0003 | 116961 | Bacteria(100);Firmicutes(100);Bacilli(100);Lactobacillales(100);firm-5(100);unclassified(100);unclassified(100);                               |
| Otu0025 | 49652  | Bacteria(100);Firmicutes(100);Bacilli(100);Lactobacillales(100);firm-5(100);unclassified(100);unclassified(100);                               |
| Otu0039 | 57445  | k__Bacteria(100);p__Firmicutes(100);c__Bacilli(100);o__Bacillales(100);f__Bacillaceae(100);g__Bacillus(100);s__Bacillusweihenstephanensi(100); |
| Otu0072 | 171259 | Bacteria(100);Proteobacteria(100);Alphaproteobacteria(100);Acetobacteriaceae(100);alpha-2.2(100);unclassified(100);unclassified(100);          |
| Otu0092 | 261126 | Bacteria(100);Firmicutes(100);Bacilli(100);Lactobacillales(100);Lactobacillales_incertae_sedis(100);unclassified(100);unclassified(100);       |
| Otu0107 | 73061  | Bacteria(100);Actinobacteria(100);Actinobacteria(100);Actinobacteridae(100);Bifidobacteriales(100);Bifidobacteriaceae(100);unclassified(100);  |
| Otu0115 | 199458 | Bacteria(100);Firmicutes(100);Bacilli(100);Lactobacillales(100);firm-5(100);unclassified(100);unclassified(100);                               |
| Otu0412 | 112348 | Bacteria(100);Firmicutes(100);Bacilli(100);Lactobacillales(100);firm-5(100);unclassified(100);unclassified(100);                               |

Supplementary File 2. Size and full RDP-NBC classification for each of the top 10 most abundant OTUs in the dataset.
